# Supplementary material
Source: publisher figshare collection journal article supplement (https://acs.figshare.com/ndownloader/files/12442349)
Supplement: Supplementary file 1 [file 12442349]

**Supporting information for**  
**Highly Efficient Transfer Hydrogenation of Levulinate Esters to**  
 **$\gamma$ -Valerolactone over Basic Zirconium Carbonate**

Fukun Li,<sup>†</sup> Zhangmin Li,<sup>†</sup> Liam John France,<sup>†</sup> Jiali Mu,<sup>†</sup> Changhua Song,<sup>†</sup> Yuan Chen,<sup>†</sup>

Lilong Jiang,<sup>‡</sup> Jinxing Long<sup>\*,†</sup> and Xuehui Li<sup>\*,†</sup>

<sup>†</sup> School of Chemistry and Chemical Engineering, State Key Laboratory of Pulp and Paper Engineering, South China University of Technology, Guangzhou, 510640, China

<sup>‡</sup> National Engineering Research Center of Chemical Fertilizer Catalyst, Fuzhou University, Fuzhou 350002, P. R. China.

**Corresponding Author**

\*E-mail: [cexhli@scut.edu.cn](mailto:cexhli@scut.edu.cn) (X. L) and [cejxlong@scut.edu.cn](mailto:cejxlong@scut.edu.cn) (J. Long). Tel: 0086 20

8711 4707. Fax: 0086 20 8711 4707.

**Table S1.** The structural information of various basic metal carbonates.

| Basic metals carbonate | Structure                                                           | Molecular weight (g mol <sup>-1</sup> ) |
|------------------------|---------------------------------------------------------------------|-----------------------------------------|
| Lead                   | $2\text{PbCO}_3 \cdot \text{Pb(OH)}_2$                              | 775.6                                   |
| Zirconium              | $(\text{ZrO})_2\text{CO}_3 (\text{OH})_2 \cdot 2\text{H}_2\text{O}$ | 344.5                                   |
| Nickel                 | $\text{NiCO}_3 \cdot 2\text{Ni(OH)}_2 \cdot 4\text{H}_2\text{O}$    | 376.2                                   |
| Zinc                   | $2\text{ZnCO}_3 \cdot 3\text{Zn(OH)}_2$                             | 549.1                                   |
| Mangesium              | $4\text{MgCO}_3 \cdot \text{Mg(OH)}_2 \cdot 5\text{H}_2\text{O}$    | 485.8                                   |

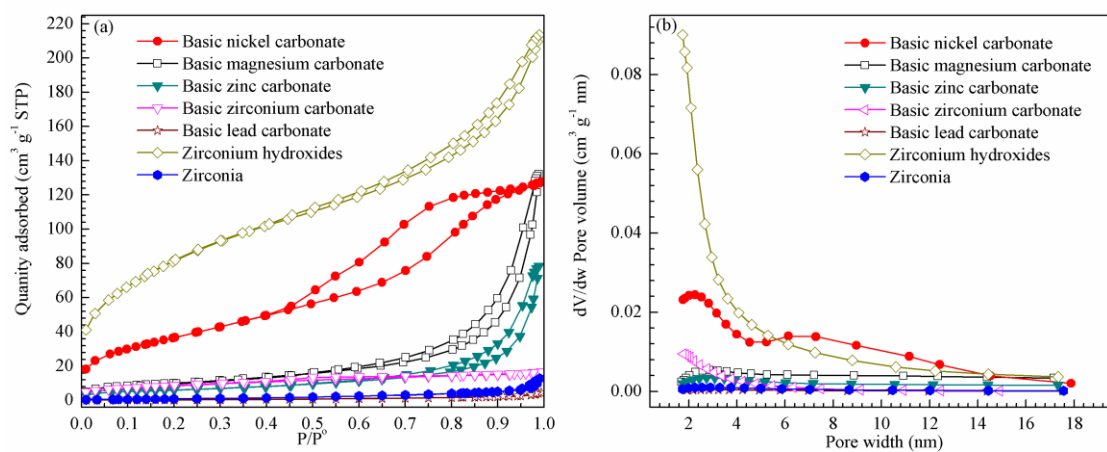

**Figure S1.** N<sub>2</sub> adsorption-desorption isotherms of various catalysts (a) and pore size distribution (b).

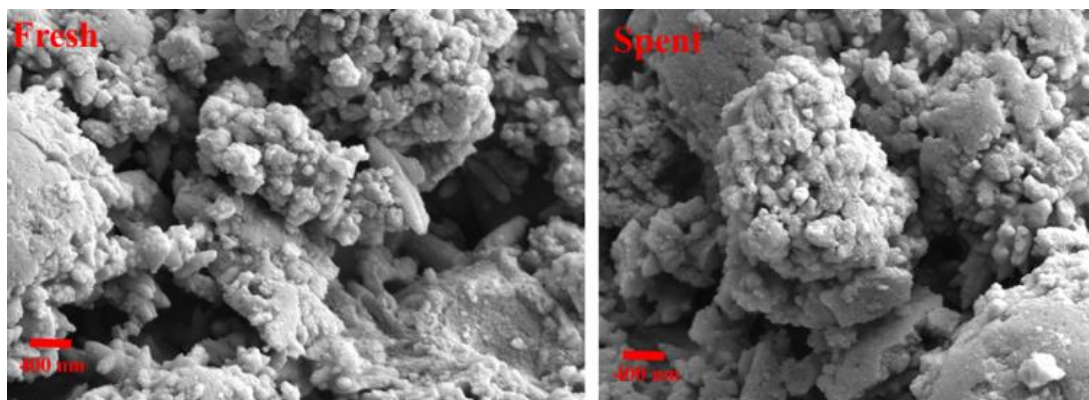

**Figure S2.** SEM images for the fresh (left) and spent catalysts (right) after six runs.

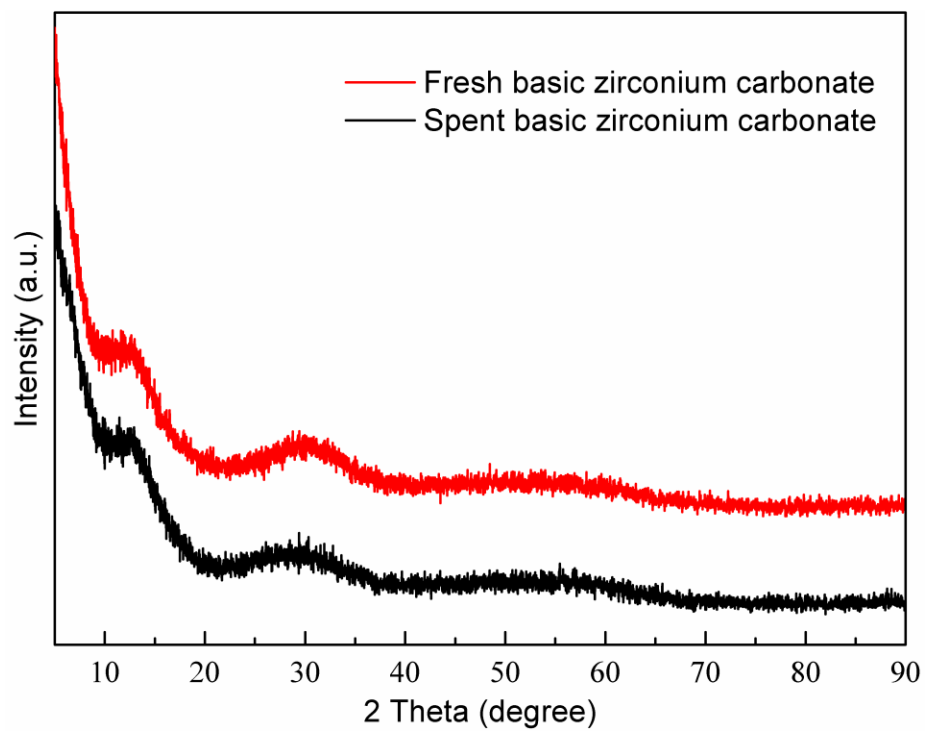

**Figure S3.** XRD patterns for the fresh and spent catalysts after six runs.

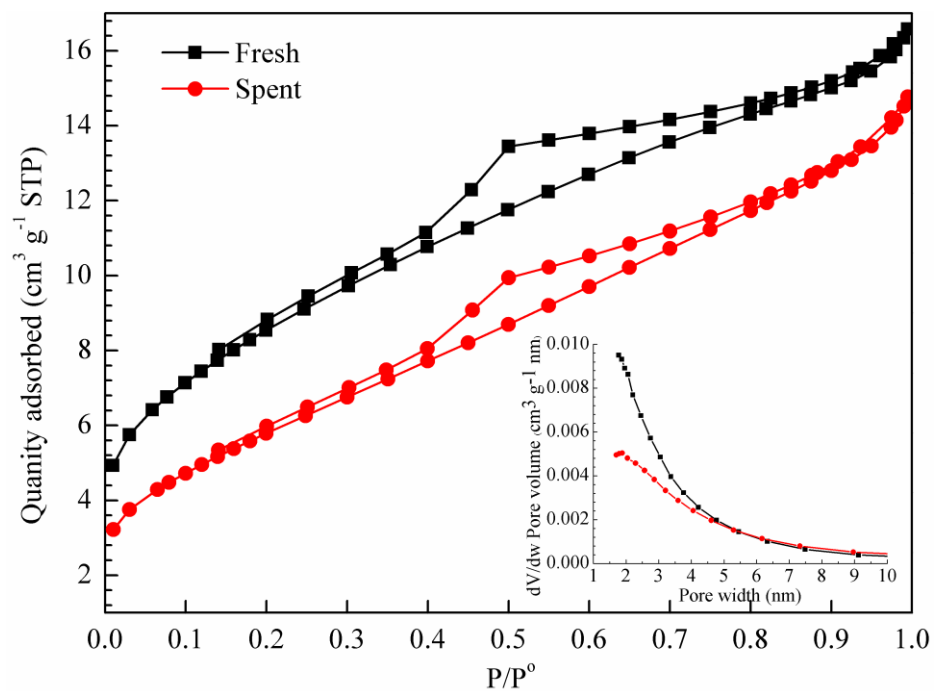

**Figure S4.**  $N_2$  adsorption-desorption isotherms of fresh and spent basic zirconium carbonate catalysts. The inset shows the resulting pore size distribution.
